# Supplementary material for: Clinician-scientist MB/PhD training in the UK: a nationwide survey of medical school policy
Source: HighWire-hosted journal article supplement (doi:10.1136/bmjopen-2015-009852), 2015-12-01
Supplement: bmjopen-2015-009852supp.pdf [file bmjopen-2015-009852supp.pdf]

Appendix 1  
Questionnaire Survey

1. Please select your Medical School (Compulsory)
2. Please state your name and role (If responding on behalf of someone else, please state their name and role too. (Compulsory)

3. Does your Medical School offer a formal MB/PhD programme? (Compulsory)

- Yes
- No
- Don't Know

4. If you answered No to Question 3, does your institution permit medical students to interrupt their medical programme to undertake an intercalated PhD? (Optional)

- Yes
- No
- Don't Know

Other (please specify)

5. If you answered Yes to Question 3 or 4, please detail; how long this arrangement has been running, the approximate number of students who have enrolled on this route since it was established, and the current annual intake. (Optional)

6. If you answered Yes to either question 3 or 4, please briefly detail the requirements students must fulfill to undertake a PhD and how they are invited to apply. (eg Academic attainment, years of study completed) (Optional)

7. If you answered Yes to either question 3 or 4, please select from the following choices of how MB/PhD training opportunities are advertised. Do MB/PhD students at your medical school have elected student representatives? (Optional)  
Please add unmentioned options in the 'other' category

- Dissemination by email to university cohorts
- Listed on medical school webpage
- Medical school notice board advertising
- Personal invitations based on academic achievement
- Individual departmental based candidate advertising and selection
- Elected MB/PhD student representatives at medical school

Other (Please specify)

8. If you answered No to either question 3 or 4, does your medical school have plans to establish an MB/PhD route? (Optional)

- Yes
- No
- Don't Know

Other (please specify)

9. If you answered No to question 8, please select from the following choices of reasons as to why. (Optional)

- Unaware of programme concept
- Perceived lack of student interest
- Perceived lack of faculty interest
- Lack of appropriate facilities
- Lack of appropriate staff
- Unconvinced of student benefit
- Unconvinced of institutional benefit
- Lack of funding for projects

10. Do you think guidelines to aid in the establishment of MB/PhD programmes should be developed for dissemination to UK medical schools? (Compulsory)

- Yes
- No
- Don't Know

Please briefly justify your answer
